# Supplementary material
Source: publisher figshare collection journal article supplement (https://acs.figshare.com/ndownloader/files/35290470)
Supplement: Supplementary file 1 [file 35290470]

Supporting Information  
**Hydrodynamic spinning of protein fractal aggregates into core-shell fibers**

Alice Vilotte,<sup>†</sup> Clément de Loubens,<sup>\*,†</sup> Deniz Z. Gunes,<sup>‡,¶</sup>  
Christophe Schmitt,<sup>‡</sup> and Hugues Bodiguel<sup>†</sup>

<sup>†</sup>Univ. Grenoble Alpes, CNRS, Grenoble INP, LRP, 38000 Grenoble, France

<sup>‡</sup>Nestlé Research, Nestlé Institute of Material Sciences, Vers-Chez-Les-Blanc, Lausanne, CH-1000 26, Switzerland

<sup>¶</sup>Present address: Department of Chemical Engineering and Center for Food and Microbial Technology, KU Leuven, 3001 Leuven, Belgium

\*E-mail: clement.de-loubens@univ-grenoble-alpes.fr

### Table of notations

|               |                                                                       |
|---------------|-----------------------------------------------------------------------|
| $C_{agg}$     | concentration of aggregates                                           |
| $C_{Ca^{2+}}$ | concentration of aggregates                                           |
| $D$           | diameter of the fibers                                                |
| $D_{Ca^{2+}}$ | diffusion coefficient of calcium ions                                 |
| $D_{agg}$     | diffusion coefficient of the aggregates                               |
| $Q_{Ca^{2+}}$ | Flow rate of calcium chloride solution                                |
| $Q_{agg}$     | Flow rate of the suspension of aggregates                             |
| $L$           | length of the tube                                                    |
| $R_h$         | hydrodynamic radius                                                   |
| $R_m$         | Molar ratio between calcium ions and WPI                              |
| $d_f$         | fractal dimension of aggregates                                       |
| $q$           | flow rate ratio between calcium chloride and suspension of aggregates |
| $r_i$         | internal radius of the coaxial needle                                 |
| $r_o$         | outer radius of the coaxial needle                                    |
| $v$           | mean flow velocity in the tube                                        |
| $v_1$         | mean critical flow velocity 1                                         |
| $v_2$         | mean critical flow velocity 2                                         |
| Re            | Reynolds number                                                       |
| Pe            | Péclet number                                                         |
| $\rho$        | density of aggregates                                                 |
| $\tau_g$      | time scale of gelation                                                |
| $\tau_r$      | residence time in the tube                                            |

### Scanning electron microscopy

For SEM imaging, fibers were washed with distilled water, freeze-dried and pasted on a stub covered with double-sided carbon tape. The specimens were coated with Au/Pd and secondary electron images were recorded with an FEI Quanta 250 scanning electron microscope equipped with a field emission gun and operating at 2.5 kV.
